# Supplementary material for: Characterizing cardiac involvement in amyloidosis using cardiovascular magnetic resonance diffusion tensor imaging
Source: PubMed Central journal article supplement (PMC6727537; doi:10.1186/s12968-019-0563-2), 2019-09-05
Supplement: 12968_2019_563_MOESM2_ESM.pdf [file 12968_2019_563_MOESM2_ESM.pdf]

## Supplemental Figure 2

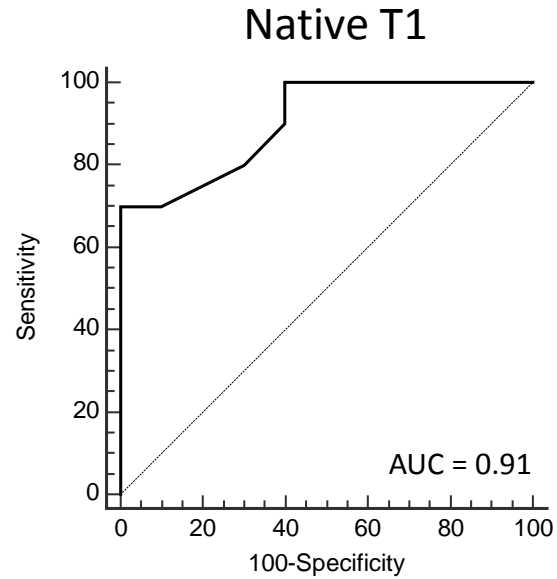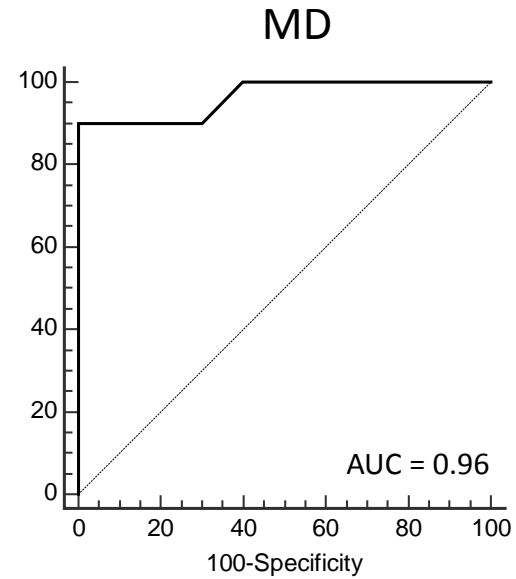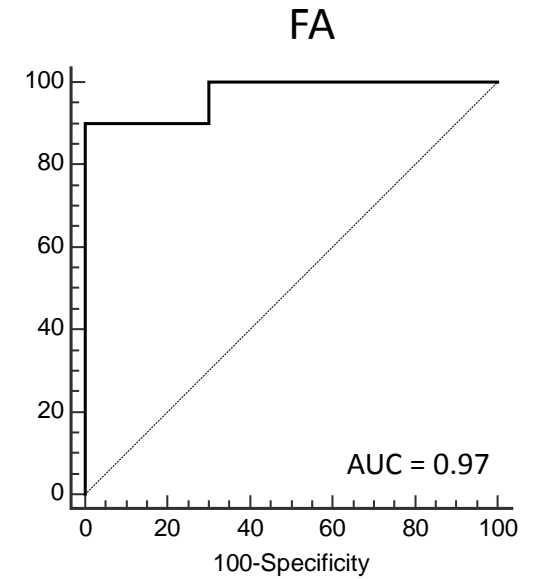

Diagnostic criterion

> 1085 ms

>  $1.51 \cdot 10^{-3} \frac{s}{mm^2}$

< 0.29

95% CI AUC

0.69 – 0.99

0.77 – 1.00

0.78 – 1.00

Sensitivity

70 %

90 %

90 %

Specificity

100 %

100 %

100 %

Abbreviations: AUC, area under the curve; CI, confidence interval; FA, fractional anisotropy; MD, mean diffusivity
